# Supplementary material
Source: Elsevier journal article supplement (https://www.sciencedirect.com/science/article/pii/S0300289621001745)
Supplement: mmc2 [file S0300289621001745:mmc2.pdf]

Supplementary Table S1

|                                     | In-hospital Death   |                     | P value            |
|-------------------------------------|---------------------|---------------------|--------------------|
|                                     | No<br>(n = 73)      | Yes<br>(n = 90)     |                    |
| <b>Demographics and comorbidity</b> |                     |                     |                    |
| Age (years)                         | 61.41 [54.70-70.35] | 71.90 [65.97-74.69] | <b>&lt; 0.0001</b> |
| Male sex                            | 52 (71.2%)          | 62 (68.9%)          | 0.8638             |
| Ethnicity                           |                     |                     | <b>&lt; 0.0001</b> |
| Caucasian                           | 51 (69.9%)          | 87 (96.7%)          |                    |
| Latin                               | 16 (21.9%)          | 1 (1.1%)            |                    |
| Other                               | 1 (1.4%)            | 1 (1.1%)            |                    |
| Smoker status                       |                     |                     | <b>0.0030</b>      |
| Never                               | 500 (68.5%)         | 39 (43.3%)          |                    |
| Former smoker                       | 16 (21.9%)          | 41 (45.6%)          |                    |
| Current smoker                      | 4 (5.5%)            | 8 (8.9%)            |                    |
| Obesity                             | 18 (25.7%)          | 30 (34.9%)          | 0.2282             |
| Charlson Index                      | 0.00 [0.00-1.00]    | 2.00 [1.00-3.00]    | <b>&lt; 0.0001</b> |
| Hypertension                        | 30 (41.1%)          | 69 (76.7%)          | <b>&lt; 0.0001</b> |
| Diabetes mellitus                   | 14 (19.2%)          | 43 (47.8%)          | <b>0.0001</b>      |
| COPD                                | 2 (2.7%)            | 19 (21.1%)          | <b>0.0003</b>      |
| Obstructive sleep apnea             | 6 (8.2%)            | 13 (14.6%)          | 0.2307             |
| Heart failure                       | 3 (4.1%)            | 15 (16.7%)          | <b>0.0119</b>      |
| <b>Clinical presentation</b>        |                     |                     |                    |
| Duration of symptoms (days)         | 7 [5-10]            | 6 [4-8]             | <b>0.0175</b>      |
| Respiratory rate > 20 breaths/min   | 25 (35.2%)          | 52 (58.4%)          | <b>0.0042</b>      |
| Altered mental status               | 3 (4.2%)            | 14 (15.7%)          | <b>0.0202</b>      |
| C-reactive protein (mg/L)           | 133.0 [65.1-221.2]  | 106.0 [41.0-186.5]  | 0.1236             |
| D-dimer (ng/mL)                     | 719 [400-1280]      | 1015 [630-1750]     | <b>0.0349</b>      |
| Lymphocyte count (cells/ $\mu$ L)   | 850 [700-1130]      | 780 [500-1140]      | 0.1896             |
| SaO <sub>2</sub> /FiO <sub>2</sub>  | 419 [328.6-442.9]   | 378.6 [186.3-428.6] | <b>0.0174</b>      |
| <b>Treatments received</b>          |                     |                     |                    |
| Lopinavir/ritonavir                 | 48 (65.8%)          | 56 (62.2%)          | 0.7434             |
| Hydroxychloroquine                  | 69 (94.5%)          | 76 (84.4%)          | <b>0.0469</b>      |
| Remdesivir                          | 2 (2.7%)            | 0 (0.0%)            | 0.2015             |
| Corticosteroids                     | 57 (78.1%)          | 57 (63.3%)          | <b>0.0583</b>      |
| Tocilizumab                         | 31 (42.5%)          | 15 (16.7%)          | <b>0.0004</b>      |
| Antibiotic use                      | 67(98.5%)           | 83 (93.3%)          | 0.1402             |
| Beta-lactamic                       | 55 (82.1%)          | 64 (71.9%)          | 0.1832             |
| Quinolone                           | 11 (16.4%)          | 16 (18.2%)          | 0.8332             |
| Azithromycin                        | 47 (69.1%)          | 47 (52.8%)          | <b>0.0488</b>      |
| <b>Prone position</b>               |                     |                     |                    |
| Yes                                 | 34 (46.6%)          | 26 (28.9%)          | <b>0.0229</b>      |

Continuous variables are expressed as median and interquartile range [Q1-Q3]. Categorical variables are expressed as number and percentage.

COPD: Chronic obstructive pulmonary disease
